# Supplementary material for: Surface plasmon assisted preparation of X1-type Y2SiO5:Eu3+-Au luminescent crystals
Source: Royal Society of Chemistry journal article supplement (doi:10.1039/d3nr01813j), 2023-01-01
Supplement: d3nr01813j4.pdf [file d3nr01813j4.pdf]

Map

| Element  | At. No. | Netto      | Mass [%]      | Mass Norm. [%] | Atom [%]      | abs. error [%] (1 sigma) | rel. error [%] (1 sigma) |
|----------|---------|------------|---------------|----------------|---------------|--------------------------|--------------------------|
| Yttrium  | 39      | 16179      | 58.75         | 58.75          | 25.42         | 1.86                     | 3.16                     |
| Oxygen   | 8       | 32788      | 24.30         | 24.30          | 58.42         | 0.77                     | 3.15                     |
| Silicon  | 14      | 16252      | 10.65         | 10.65          | 14.59         | 0.11                     | 1.04                     |
| Gold     | 79      | 183        | 0.46          | 0.46           | 0.09          | 0.09                     | 18.75                    |
| Europium | 63      | 3772       | 5.83          | 5.83           | 1.48          | 0.62                     | 10.68                    |
|          |         | <b>Sum</b> | <b>100.00</b> | <b>100.00</b>  | <b>100.00</b> |                          |                          |
