# Supplementary material for: Surface plasmon assisted preparation of X1-type Y2SiO5:Eu3+-Au luminescent crystals
Source: Royal Society of Chemistry journal article supplement (doi:10.1039/d3nr01813j), 2023-01-01
Supplement: d3nr01813j9.pdf [file d3nr01813j9.pdf]

## Supplementary Information

### Surface plasmon assisted preparation of X1-type $Y_2SiO_5:Eu^{3+}$ -Au luminescent crystal

Lei Xi,<sup>a,b</sup> Chengyun Zhang,<sup>c</sup> Hairegu Tuxun,<sup>a,b</sup> Baobao Zhang,<sup>a,b</sup> Min Ji,<sup>a,b</sup> Xilin Zhou,<sup>a,b</sup> Wanqiu Liang,<sup>a,b</sup> Jinyu Li,<sup>a,b</sup> Huan Chen,<sup>a,b</sup> Jinping Li,<sup>\*a,b</sup> Zhengkun Fu,<sup>\*a,b</sup> Zhenglong Zhang<sup>a,b</sup> and Hairong Zheng<sup>a,b</sup>

<sup>a</sup>. School of Physics and Information Technology, Shaanxi Normal University, Xi'an 710062, China. E-mail: [ljping@snnu.edu.cn](mailto:ljping@snnu.edu.cn), [zkfu@snnu.edu.cn](mailto:zkfu@snnu.edu.cn)

<sup>b</sup>. Xi'an Key Laboratory of Optical Information Manipulation and Augmentation, Xi'an 710062, China

<sup>c</sup>. School of Electronic Engineering, Xi'an University of Posts & Telecommunications, Xi'an 710121, China

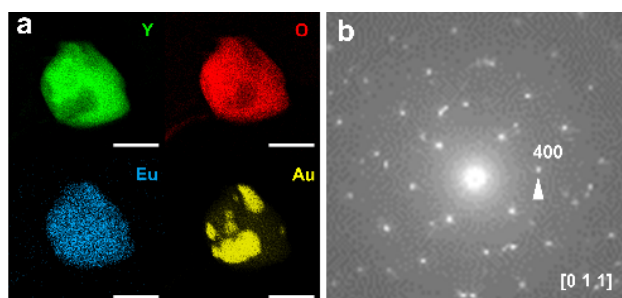

**Fig. S1.** (a) EDX elemental mapping analysis and (b) SAED pattern of the transformation product of the composite structure  $NaYF_4:Eu^{3+}@SiO_2(5\text{ nm})@Au$ , and the scale bar is 200 nm in (a), SAED pattern of the particle after transformation is taken along [011] zone axes in (b).

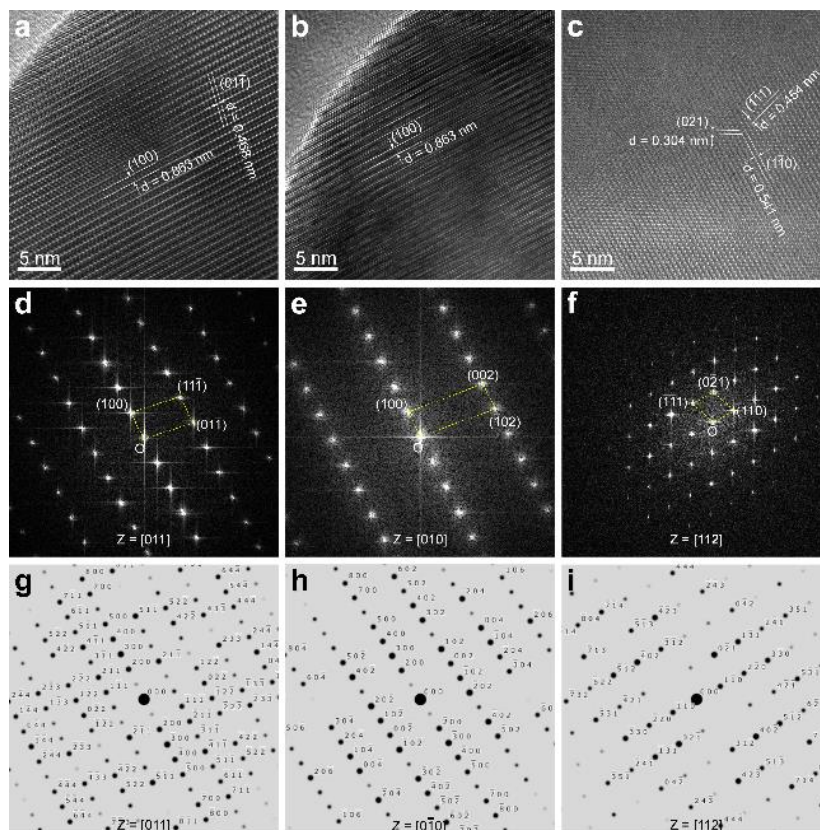

**Fig. S2.** HR-TEM images for the transformation product of the composite  $NaYF_4:Eu^{3+}@SiO_2(15\text{ nm})@Au$  in Figure 3g (upper inset), acquired along (a) [011], (b) [0-10], and (c) [112] axis, respectively. Corresponding (d-f) FFT images and (g-i) simulations of electron diffraction patterns of X1- $Y_2SiO_5$  according to PDF-1 No.52-1810 standard card.

Map

| Element  | At. No. | Netto      | Mass [%]      | Mass Norm. [%] | Atom [%]      | abs. error [%] (1 sigma) | rel. error [%] (1 sigma) |
|----------|---------|------------|---------------|----------------|---------------|--------------------------|--------------------------|
| Yttrium  | 39      | 16179      | 58.75         | 58.75          | 25.42         | 1.86                     | 3.16                     |
| Oxygen   | 8       | 32788      | 24.30         | 24.30          | 58.42         | 0.77                     | 3.15                     |
| Silicon  | 14      | 16252      | 10.65         | 10.65          | 14.59         | 0.11                     | 1.04                     |
| Gold     | 79      | 183        | 0.46          | 0.46           | 0.09          | 0.09                     | 18.75                    |
| Europium | 63      | 3772       | 5.83          | 5.83           | 1.48          | 0.62                     | 10.68                    |
|          |         | <b>Sum</b> | <b>100.00</b> | <b>100.00</b>  | <b>100.00</b> |                          |                          |

Fig. S3. EDX elemental mapping analysis of the elements content in Figure 3j.

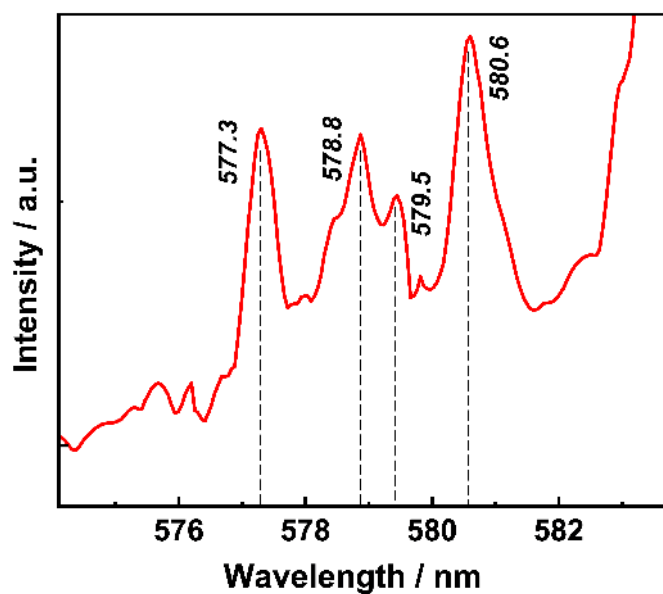

Fig. S4. Partial zoom-in luminescence spectrum of  ${}^5D_0 \rightarrow {}^7F_0$  transitions of  $\text{Eu}^{3+}$  ions in the transformation product of the composite structure  $\text{NaYF}_4:\text{Eu}^{3+}@\text{SiO}_2(30 \text{ nm})@\text{Au}$  in Figure 3h.

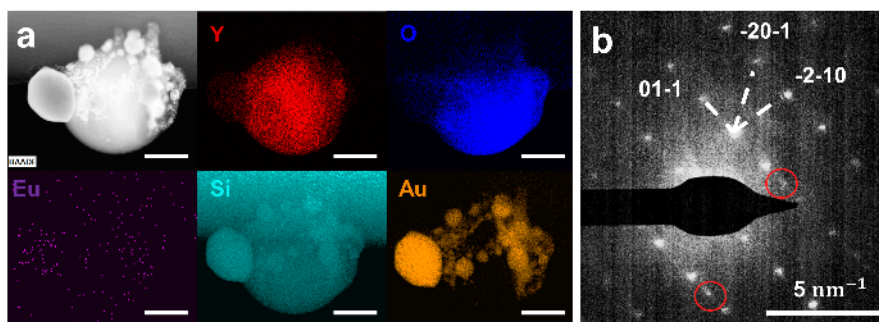

Fig. S5. (a) High angle annular dark-field (HAADF) scanning transmission electron microscopy (STEM) image, EDX elemental mapping analysis (scale bar is 200 nm) and (b) SAED pattern of the transformation product of the composite structure  $\text{NaYF}_4:\text{Eu}^{3+}@\text{SiO}_2(30 \text{ nm})@\text{Au}$ .

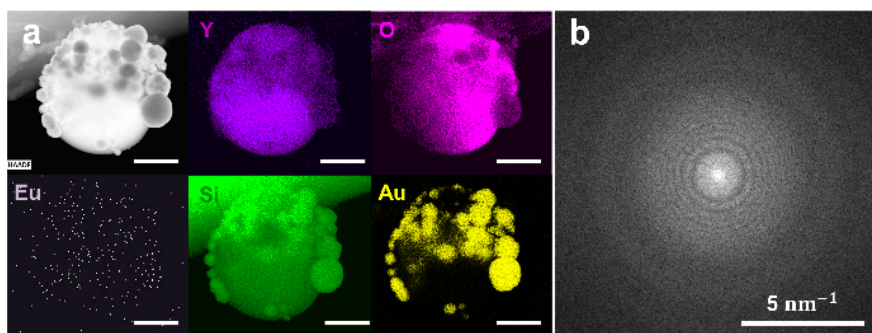

**Fig. S6.** (a) High angle annular dark-field (HAADF) scanning transmission electron microscopy (STEM) image, EDX elemental mapping analysis (scale bar is 200 nm) and (b) SAED pattern of the transformation product of the composite structure  $\text{NaYF}_4:\text{Eu}^{3+}@\text{SiO}_2(90\text{ nm})@\text{Au}$ .

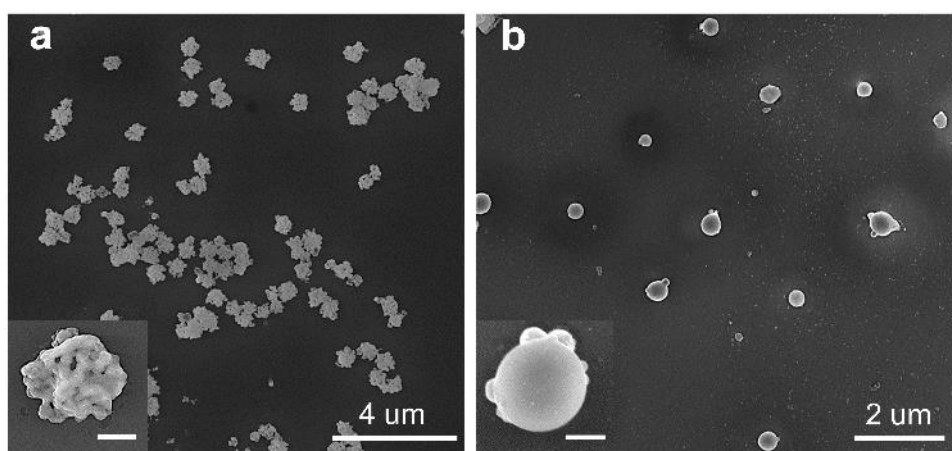

**Fig. S7.** SEM images of multiple  $\text{NaYF}_4:\text{Eu}^{3+}@\text{SiO}_2(15\text{ nm})@\text{Au}$  particles and the corresponding single particle (Insets, scale bar is 200 nm) under (a) conventional annealing at 1050 °C for 1 h and (b) 532 nm CW laser irradiation.
