# Supplementary figures and images for: Surface plasmon assisted preparation of X1-type Y2SiO5:Eu3+-Au luminescent crystals
Source: Royal Society of Chemistry journal article supplement (doi:10.1039/d3nr01813j), 2023-01-01

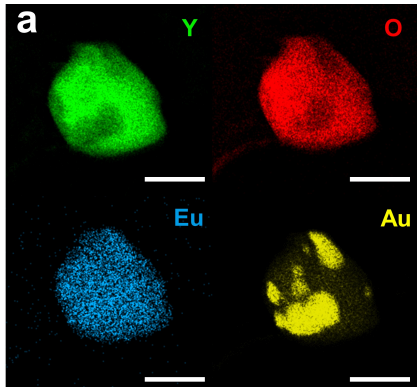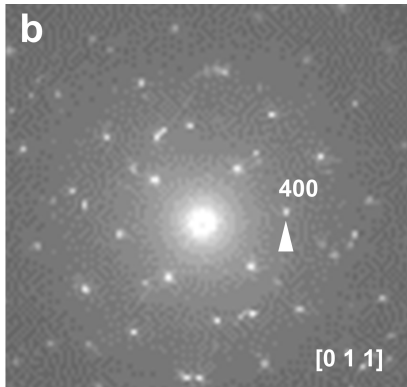

Supplement: d3nr01813j2.pdf [file d3nr01813j2.pdf]

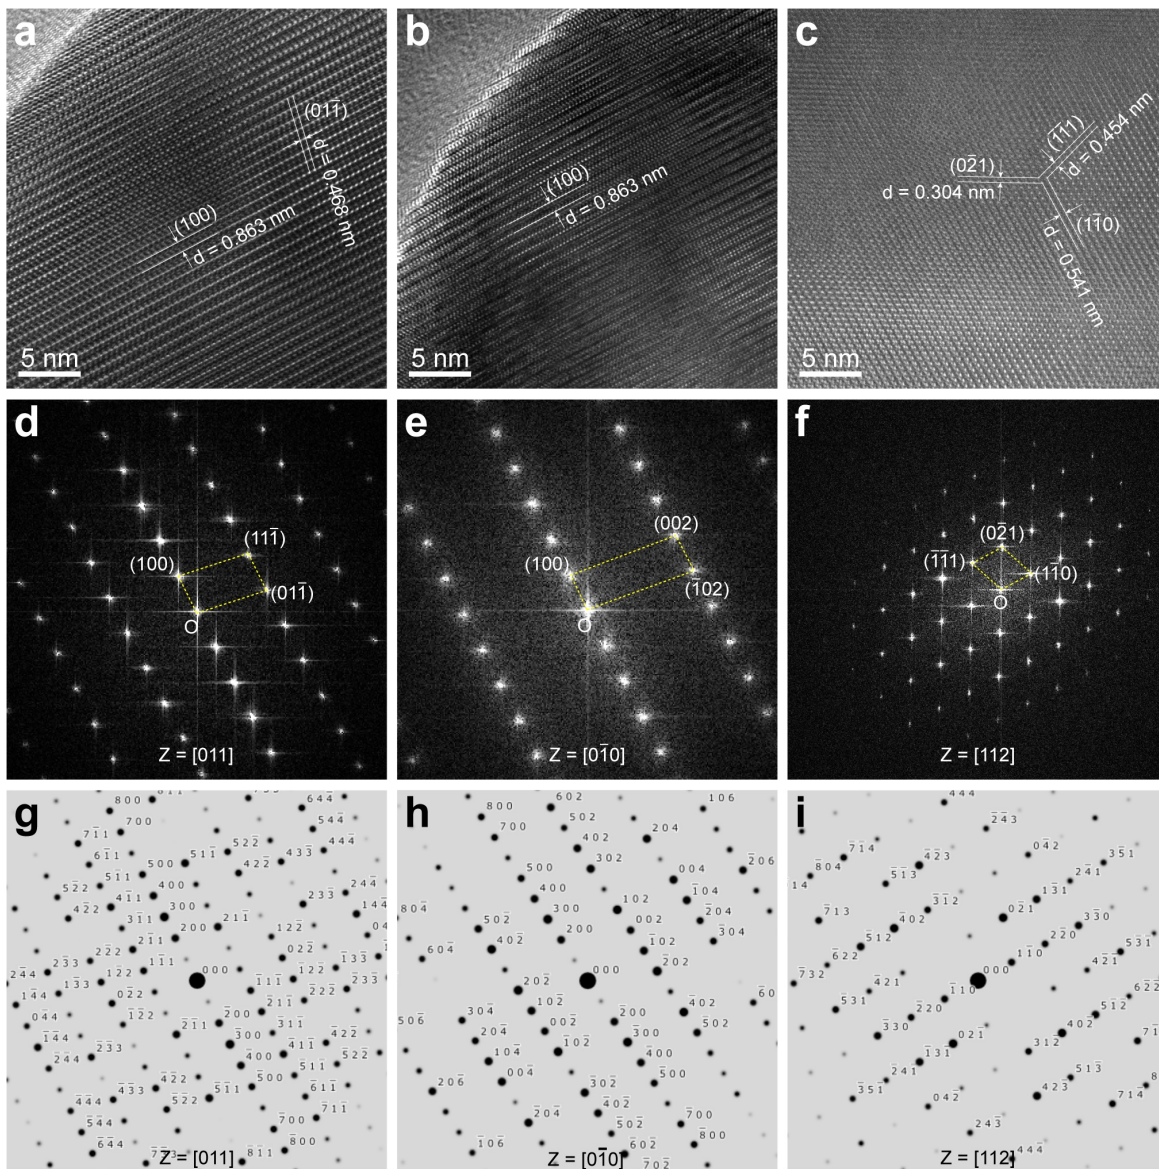

Supplement: d3nr01813j3.pdf [file d3nr01813j3.pdf]

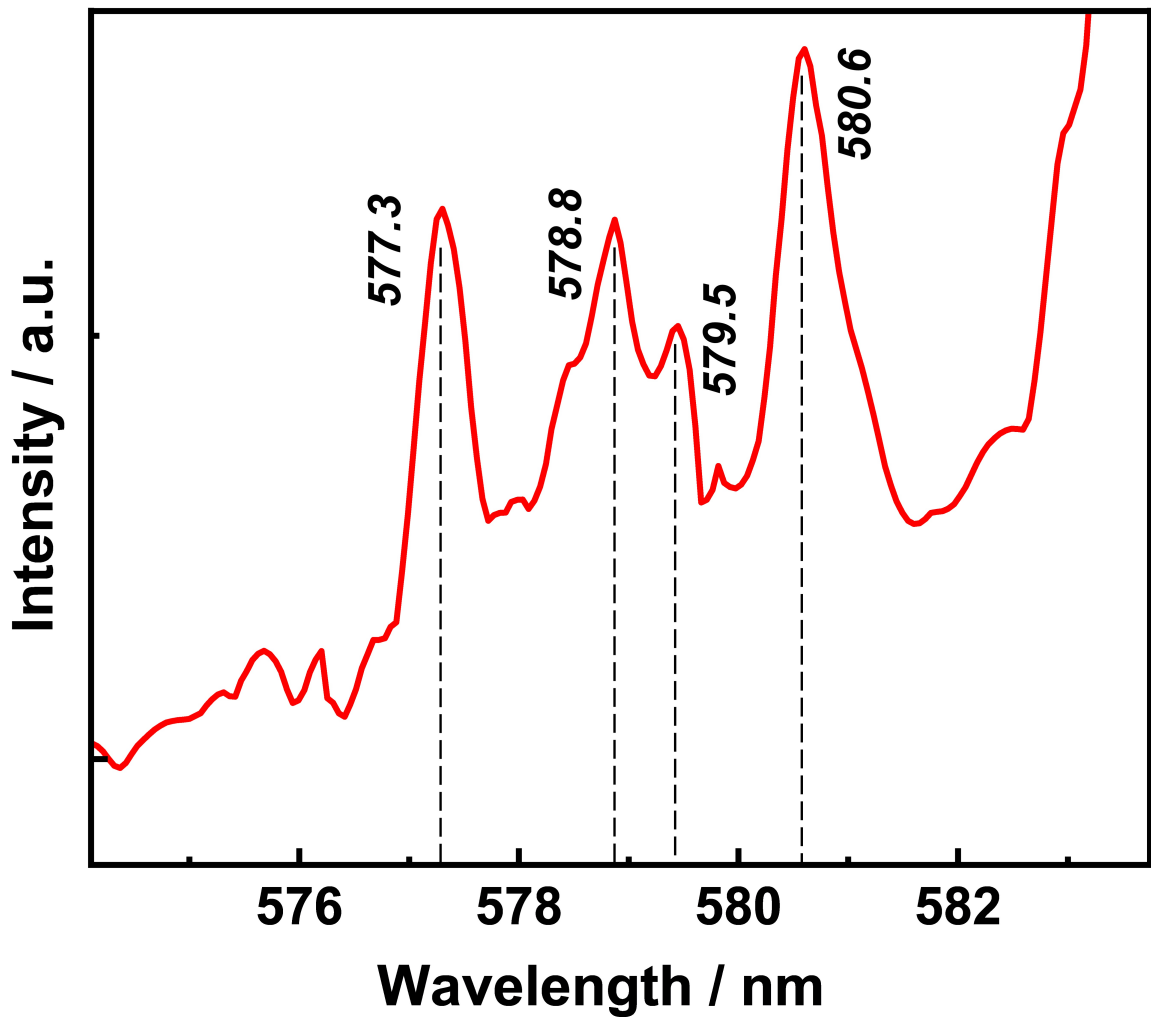

Supplement: d3nr01813j5.pdf [file d3nr01813j5.pdf]

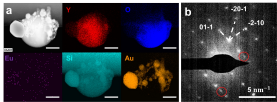

Supplement: d3nr01813j6.pdf [file d3nr01813j6.pdf]

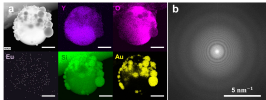

Supplement: d3nr01813j7.pdf [file d3nr01813j7.pdf]

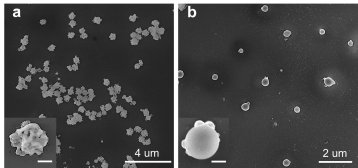

Supplement: d3nr01813j8.pdf [file d3nr01813j8.pdf]
